# Supplementary material for: Genome-Wide Association Study Identifies Genomic Loci Associated With Neurotransmitter Concentration in Cattle
Source: Front Genet. 2020 Mar 27;11:139. doi: 10.3389/fgene.2020.00139 (PMC7119242; doi:10.3389/fgene.2020.00139)
Supplement: TABLE S1 — Summary of sequencing data. [file Data_Sheet_1.xlsx]

## Sheet: Table S1
Sample ID	Accession number	Breeds	Number of clean reads	Mapping rate	Mean depth (X)
CDY006	SRR9721837	Yunling	95512551	0.9964	6.2993
CDY016	SRR9721838	Yunling	112046683	0.9944	5.5567
CDY023	SRR9721839	Yunling	105495939	0.9966	5.7039
CDY026	SRR9721832	Yunling	123469886	0.9956	5.0891
CDY028	SRR9721833	Yunling	104672882	0.9968	5.7961
CDY029	SRR9721834	Yunling	114813218	0.997	5.1352
CDY030	SRR9721801	Brahman	107483194	0.9954	5.0845
CDY031	SRR9721835	Yunling	111591065	0.9971	5.6421
CDY034	SRR9721802	Brahman	94768816	0.9967	5.9955
CDY035	SRR9721840	Yunling	106471835	0.9969	6.0833
CDY041	SRR9721841	Yunling	79703938	0.9962	5.9431
CDY044	SRR9721763	Yunling	90588062	0.9948	6.7862
CDY050	SRR9721762	Yunling	105966369	0.996	5.7578
CDY051	SRR9721799	Brahman	106372089	0.9961	5.6441
CDY052	SRR9721765	Yunling	97207027	0.9967	5.4443
CDY055	SRR9721764	Yunling	97570005	0.9953	5.7024
CDY056	SRR9721759	Yunling	116299218	0.9953	4.4747
CDY058	SRR9721758	Yunling	96325508	0.9961	5.8528
CDY061	SRR9721761	Yunling	98758988	0.996	6.004
CDY069	SRR9721760	Yunling	100703574	0.9953	5.1323
CDY075	SRR9721757	Yunling	114286998	0.996	5.1562
CDY077	SRR9721756	Yunling	107158419	0.9958	4.4264
CDY081	SRR9721785	Yunling	107118007	0.995	5.8821
CDY086	SRR9721786	Yunling	110548973	0.996	6.2296
CDY087	SRR9721783	Yunling	117356806	0.9963	5.0668
CDY088	SRR9721784	Yunling	108263905	0.996	5.0804
CDY089	SRR9721781	Yunling	111973416	0.9963	4.984
CDY090	SRR9721782	Yunling	93314452	0.9966	5.8351
CDY093	SRR9721779	Yunling	127087375	0.996	5.9667
CDY106	SRR9721780	Yunling	86809768	0.9946	4.9381
CDY110	SRR9721777	Yunling	106957571	0.9953	6.5855
CDY130	SRR9721800	Brahman	118055005	0.9962	6.6087
CDY131	SRR9721805	Brahman	104567712	0.9946	5.5915
CDY132	SRR9721778	Yunling	106730697	0.9959	5.317
CDY135	SRR9721803	Brahman	108548819	0.9964	5.743
CDY136	SRR9721804	Brahman	96469629	0.9934	5.8836
CDY137	SRR9721807	Brahman	105328929	0.996	5.0474
CDY138	SRR9721855	Yunling	113760864	0.995	5.5581
CDY144	SRR9721808	Brahman	111449813	0.996	5.692
CDY146	SRR9721694	Brahman	127412325	0.9955	4.2263
CDY147	SRR9721695	Brahman	108136848	0.9959	4.8325
CDY148	SRR9721692	Brahman	102135661	0.9953	5.5957
CDY159	SRR9721693	Brahman	107278182	0.9955	5.6718
CDY161	SRR9721852	Yunling	84050704	0.9965	6.3959
CDY163	SRR9721698	Brahman	109926587	0.9957	5.1754
CDY164	SRR9721699	Brahman	112611592	0.9959	5.2045
CDY165	SRR9721696	Brahman	96600080	0.995	6.1905
CDY167	SRR9721697	Brahman	96477242	0.9949	5.1397
CDY168	SRR9721700	Brahman	83154024	0.9954	5.2622
CDY172	SRR9721701	Brahman	110455014	0.9944	5.3487
CDY174	SRR9721816	Brahman	116736597	0.9948	6.0846
CDY175	SRR9721815	Brahman	94944382	0.9946	5.7094
CDY176	SRR9721814	Brahman	95344106	0.9964	5.7182
CDY181	SRR9721813	Brahman	93289410	0.9955	5.9022
CDY193	SRR9721820	Brahman	109289680	0.994	6.2084
CDY194	SRR9721819	Brahman	112126145	0.9962	5.7847
CDY195	SRR9721689	Yunling	93070624	0.9955	5.8469
CDY197	SRR9721818	Brahman	123501341	0.9966	5.996
CDY201	SRR9721809	Yunling	99890374	0.9952	5.7554
CDY202	SRR9721817	Brahman	104467309	0.9949	4.9676
CDY204	SRR9721812	Yunling	119714436	0.9957	5.5606
CDY206	SRR9721796	Yunling	109888810	0.9954	6.0717
CDY207	SRR9721736	Yunling	108110638	0.9959	4.8916
CDY210	SRR9721776	Yunling	104277838	0.9967	6.1999
CDY216	SRR9721731	Yunling	113743957	0.9957	5.2669
CDY219	SRR9721749	Yunling	115903905	0.9959	5.5163
CDY220	SRR9721750	Yunling	98532360	0.9963	5.1856
CDY224	SRR9721751	Yunling	94764564	0.9947	5.3894
CDY227	SRR9721752	Yunling	103075016	0.9942	5.5627
CDY228	SRR9721754	Yunling	97071261	0.9948	4.918
CDY234	SRR9721755	Yunling	101242462	0.9967	4.7379
CDY235	SRR9721787	Yunling	104331258	0.9966	6.4951
CDY240	SRR9721821	Yunling	92229217	0.9957	5.6993
CDY241	SRR9721766	Yunling	88473296	0.994	6.0691
CDY245	SRR9721768	Yunling	121378879	0.9955	6.0064
CDY248	SRR9721767	Yunling	107010173	0.9905	7.5329
CDY249	SRR9721753	Yunling	113753033	0.9963	5.516
CDY255	SRR9721734	Yunling	103046214	0.9951	5.0058
CDY256	SRR9721738	Yunling	110525774	0.996	5.1465
CDY257	SRR9721737	Yunling	122455128	0.9956	5.4814
CDY261	SRR9721719	Yunling	93836269	0.9953	4.6534
CDY263	SRR9721718	Yunling	96164332	0.9943	4.8896
CDY264	SRR9721712	Yunling	102666102	0.9961	5.9464
CDY267	SRR9721713	Yunling	87283882	0.9951	5.4542
CDY270	SRR9721710	Yunling	91894445	0.9939	6.4698
CDY272	SRR9721711	Yunling	111221310	0.9944	6.2333
CDY274	SRR9721690	Yunling	102178384	0.9956	5.2247
CDY279	SRR9721691	Yunling	122008784	0.9951	6.363
CDY280	SRR9721714	Yunling	117367993	0.9958	5.063
CDY281	SRR9721715	Yunling	97794824	0.9939	6.0927
CDY284	SRR9721853	Yunling	119286919	0.9957	5.4675
CDY286	SRR9721854	Yunling	94852958	0.9943	6.1355
CDY291	SRR9721811	Brahman	114714624	0.9961	6.7968
CDY308	SRR9721810	Brahman	102788886	0.996	4.6319
CDY309	SRR9721740	Yunling	115037729	0.9953	4.8609
CDY310	SRR9721739	Yunling	91206193	0.994	5.9125
CDY315	SRR9721742	Yunling	111159147	0.9962	4.8963
CDY320	SRR9721741	Yunling	91831939	0.9947	6.4621
CDY323	SRR9721744	Yunling	121452174	0.995	5.6905
CDY326	SRR9721743	Yunling	106857928	0.9949	6.0009
CDY328	SRR9721746	Yunling	112495252	0.9946	5.8944
CDY333	SRR9721745	Yunling	110787021	0.9958	5.2307
CDY334	SRR9721748	Yunling	98179358	0.9948	5.4921
CDY335	SRR9721747	Yunling	103071110	0.9941	5.5754
CDY337	SRR9721722	Yunling	104774344	0.9931	5.16
CDY338	SRR9721723	Yunling	97206483	0.9954	5.9348
CDY339	SRR9721720	Yunling	111553318	0.988	5.4601
CDY341	SRR9721836	Brahman	104441615	0.9965	5.7253
CDY344	SRR9721721	Yunling	99185301	0.9946	5.2864
CDY351	SRR9721726	Yunling	113731324	0.9923	6.0265
CDY353	SRR9721727	Yunling	112627642	0.9919	5.9551
CDY357	SRR9721724	Yunling	108112874	0.9956	5.7636
CDY358	SRR9721725	Yunling	90190423	0.9965	4.8176
CDY359	SRR9721728	Yunling	121015036	0.9956	6.448
CDY365	SRR9721729	Yunling	98837020	0.9956	5.2402
CDY367	SRR9721709	Yunling	107827654	0.9888	5.6876
CDY369	SRR9721708	Yunling	111873623	0.9971	5.9939
CDY371	SRR9721707	Yunling	112433450	0.9953	5.9655
CDY374	SRR9721706	Yunling	91708757	0.9968	4.9087
CDY375	SRR9721705	Yunling	98251213	0.9964	5.2616
CDY380	SRR9721704	Yunling	105161019	0.9962	5.6081
CDY387	SRR9721703	Yunling	102830597	0.9958	5.4689
CDY388	SRR9721702	Yunling	99750749	0.9966	5.337
CDY389	SRR9721717	Yunling	94962160	0.9951	5.0527
CDY394	SRR9721716	Yunling	120973692	0.9964	6.4752
CDY396	SRR9721681	Yunling	115916821	0.9965	6.1711
CDY397	SRR9721682	Yunling	99410105	0.9964	5.3249
CDY399	SRR9721683	Yunling	117139374	0.9968	6.2708
CDY400	SRR9721684	Yunling	111384275	0.9966	5.9597
CDY402	SRR9721685	Yunling	101402923	0.9959	5.4053
CDY403	SRR9721686	Yunling	106625575	0.9965	5.6927
CDY404	SRR9721687	Yunling	103417012	0.9934	5.5063
CDY405	SRR9721688	Yunling	101285392	0.9961	5.4108
CDY408	SRR9721679	Yunling	105417041	0.9954	5.6096
CDY410	SRR9721680	Yunling	100918503	0.996	5.3968
CDY413	SRR9721849	Yunling	102043409	0.9965	5.4539
CDY416	SRR9721848	Yunling	102571680	0.9969	5.4924
CDY418	SRR9721851	Yunling	100841659	0.9966	5.3866
CDY420	SRR9721850	Yunling	115096052	0.9962	6.1571
CDY422	SRR9721845	Yunling	118335160	0.9967	6.3297
CDY426	SRR9721844	Yunling	90469881	0.9955	4.8387
CDY427	SRR9721847	Yunling	114130185	0.9957	6.0862
CDY429	SRR9721846	Yunling	104434764	0.9952	5.5618
CDY430	SRR9721843	Yunling	111974395	0.9962	5.9975
CDY433	SRR9721842	Yunling	111152105	0.9954	5.9243
CDY437	SRR9721830	Yunling	102842188	0.9951	5.4771
CDY441	SRR9721831	Yunling	95873122	0.9957	5.1353
CDY443	SRR9721828	Yunling	98394840	0.9964	5.2506
CDY444	SRR9721829	Yunling	112402944	0.9951	5.9978
CDY449	SRR9721826	Yunling	108818358	0.996	5.8203
CDY451	SRR9721827	Yunling	103457246	0.9958	5.5276
CDY457	SRR9721824	Yunling	104112499	0.9946	5.5534
CDY460	SRR9721825	Yunling	104000843	0.9962	5.544
CDY463	SRR9721822	Yunling	90188035	0.9957	4.8106
CDY467	SRR9721823	Yunling	99764301	0.9962	5.3266
CDY469	SRR9721791	Yunling	93091226	0.9959	4.9707
CDY472	SRR9721790	Yunling	107554510	0.9954	5.7311

## Sheet: Table S2
Chromosome	Position	Pward	Func.refGene	Gene.refGene	GeneDetail.refGene
4	63847815	4.12e-07	intronic	FKBP9	.
4	84001170	5.39e-07	intergenic	LSM8,LOC112446347	dist\x3d1194148\x3bdist\x3d682888
4	84005564	9.11e-08	intergenic	LSM8,LOC112446347	dist\x3d1198542\x3bdist\x3d678494
8	71966987	4.76e-07	intergenic	ADAM7,NEFM	dist\x3d260950\x3bdist\x3d214221
15	68085551	8.72e-08	intergenic	C15H11orf74,NONE	dist\x3d996194\x3bdist\x3dNONE
15	68091006	2e-07	intergenic	C15H11orf74,NONE	dist\x3d1001649\x3bdist\x3dNONE
15	68539882	7.7e-07	intergenic	C15H11orf74,LRRC4C	dist\x3d1450525\x3bdist\x3d1858049
15	68539937	1.06e-06	intergenic	C15H11orf74,LRRC4C	dist\x3d1450580\x3bdist\x3d1857994
15	68661388	1.08e-06	intergenic	C15H11orf74,LRRC4C	dist\x3d1572031\x3bdist\x3d1736543
15	68710934	2.81e-07	intergenic	C15H11orf74,LRRC4C	dist\x3d1621577\x3bdist\x3d1686997
15	68762178	8.71e-07	intergenic	C15H11orf74,LRRC4C	dist\x3d1672821\x3bdist\x3d1635753
15	68762588	8.62e-07	intergenic	C15H11orf74,LRRC4C	dist\x3d1673231\x3bdist\x3d1635343
15	68786069	1.05e-06	intergenic	C15H11orf74,LRRC4C	dist\x3d1696712\x3bdist\x3d1611862
15	68787089	7.21e-08	intergenic	C15H11orf74,LRRC4C	dist\x3d1697732\x3bdist\x3d1610842
15	68787135	2.77e-07	intergenic	C15H11orf74,LRRC4C	dist\x3d1697778\x3bdist\x3d1610796
15	68787496	5.12e-07	intergenic	C15H11orf74,LRRC4C	dist\x3d1698139\x3bdist\x3d1610435
15	68787572	1.12e-06	intergenic	C15H11orf74,LRRC4C	dist\x3d1698215\x3bdist\x3d1610359
15	68790194	8.74e-07	intergenic	C15H11orf74,LRRC4C	dist\x3d1700837\x3bdist\x3d1607737
15	69203472	9.55e-07	intergenic	NONE,LRRC4C	dist\x3dNONE\x3bdist\x3d1194459
15	69208676	4.25e-08	intergenic	NONE,LRRC4C	dist\x3dNONE\x3bdist\x3d1189255
15	69238834	1e-07	intergenic	NONE,LRRC4C	dist\x3dNONE\x3bdist\x3d1159097
15	69989675	6.79e-07	intergenic	NONE,LRRC4C	dist\x3dNONE\x3bdist\x3d408256
15	74154782	4.27e-07	intergenic	C15H11orf96,ACCSL	dist\x3d109424\x3bdist\x3d6190
15	74169954	8.72e-07	intronic	ACCSL	.
15	74170000	5.95e-07	intronic	ACCSL	.
15	74182969	1.06e-06	intronic	ACCS	.
15	74186549	1.59e-07	intronic	ACCS	.
15	74195072	5.92e-07	intronic	ACCS	.
19	3390952	9.85e-07	intergenic	CA10,KIF2B	dist\x3d1972493\x3bdist\x3d386971
19	58424044	6.61e-07	intronic	SLC39A11	.
19	58424061	2.17e-07	intronic	SLC39A11	.
19	58426162	6.6e-07	intronic	SLC39A11	.
22	27517768	2.02e-07	intergenic	CNTN3,PDZRN3	dist\x3d99281\x3bdist\x3d600588
22	27527029	6.22e-07	intergenic	CNTN3,PDZRN3	dist\x3d108542\x3bdist\x3d591327
24	34588807	3.23e-07	intronic	ABHD3	.
27	29535219	2.6e-07	intergenic	DUSP26,UNC5D	dist\x3d246567\x3bdist\x3d1197341

## Sheet: Table S3
Chromosome	Position	Pward	Func.refGene	Gene.refGene	GeneDetail.refGene
1	51221200	8.32e-07	intergenic	CBLB,MIR2286	dist\x3d739801\x3bdist\x3d567201
3	9870207	8.58e-07	UTR3	FCRL6	XM_015461679.2:c.*169A>G
12	75455859	8.78e-07	intronic	FARP1	.
12	76815037	4.61e-07	intronic	PCCA	.
12	76846782	1.23e-06	intronic	PCCA	.
12	76859881	5.25e-08	intronic	PCCA	.
12	76912319	2.96e-07	intronic	PCCA	.
12	76912606	3.83e-07	intronic	PCCA	.
13	55200078	1.13e-06	intronic	CDH4	.
17	44749720	1.07e-06	intergenic	FBRSL1,GALNT9	dist\x3d43025\x3bdist\x3d104240
18	28867194	9.71e-07	intergenic	TRNAW-CCA,TRNAA-AGC	dist\x3d1922862\x3bdist\x3d381995
19	40301775	1.17e-07	intronic	GSDMA	.
19	40303983	3.7e-07	exonic	GSDMA	.
19	40306369	7.26e-07	intergenic	GSDMA,PSMD3	dist\x3d1987\x3bdist\x3d4069
19	40308396	9.81e-07	intergenic	GSDMA,PSMD3	dist\x3d4014\x3bdist\x3d2042
19	40310333	1.11e-06	upstream	PSMD3	.
23	31442141	8.92e-07	upstream	TRNAA-AGC	.
23	37336886	9.94e-07	intronic	CDKAL1	.
23	37344295	8.08e-07	intronic	CDKAL1	.
23	37344450	6.41e-09	intronic	CDKAL1	.
25	4788947	1.24e-06	intronic	RBFOX1	.
25	5800850	7.34e-07	intronic	RBFOX1	.
25	5848346	9.04e-07	intronic	RBFOX1	.
26	37563598	1.21e-06	intronic	SLC18A2	.
26	37563603	1.21e-06	intronic	SLC18A2	.

## Sheet: Table S4
Chromosome	Position	Pward	Func.refGene	Gene.refGene	GeneDetail.refGene
1	18928384	1.04e-06	intergenic	CHODL,C1H21orf91	dist\x3d191524\x3bdist\x3d299171
1	119329849	9.93e-08	upstream	CPA3	.
7	101433217	4.54e-07	intronic	SLCO6A1	.
8	42958091	1.17e-06	intergenic	TRNAC-GCA,DMRT2	dist\x3d154536\x3bdist\x3d548810
8	42963716	1.08e-06	intergenic	TRNAC-GCA,DMRT2	dist\x3d160161\x3bdist\x3d543185
10	71201022	1.19e-06	intergenic	DACT1,LOC112448581	dist\x3d284106\x3bdist\x3d81925
16	28978311	9.87e-08	intergenic	LOC100336971,SDE2	dist\x3d10531\x3bdist\x3d26900
16	28978321	1.1e-07	intergenic	LOC100336971,SDE2	dist\x3d10541\x3bdist\x3d26890
16	28978373	2.03e-07	intergenic	LOC100336971,SDE2	dist\x3d10593\x3bdist\x3d26838
16	28978393	3.87e-07	intergenic	LOC100336971,SDE2	dist\x3d10613\x3bdist\x3d26818
16	28979773	5.71e-07	intergenic	LOC100336971,SDE2	dist\x3d11993\x3bdist\x3d25438
22	1306833	3.33e-07	intergenic	EGFR,SEC61G	dist\x3d185293\x3bdist\x3d152947

## Sheet: Table S5
Chromosome	Position	Pward	Func.refGene	Gene.refGene	GeneDetail.refGene
3	101918733	1.57e-07	intergenic	DMAP1,KLF17	dist\x3d77054\x3bdist\x3d16898
3	102039109	2.68e-07	intronic	SLC6A9	.
3	102200988	3.83e-07	intronic	ST3GAL3	.
3	102401022	1.1e-06	intergenic	KDM4A,PTPRF	dist\x3d17995\x3bdist\x3d12991
3	102495677	7.48e-07	intronic	PTPRF	.
4	98659547	4.29e-07	intronic	CALD1	.
5	110964534	5.87e-07	intergenic	RPS19BP1,LOC112446630	dist\x3d9584\x3bdist\x3d24404
5	111980228	5.6e-08	intergenic	MKL1,MCHR1	dist\x3d28894\x3bdist\x3d9380
5	111980732	1.45e-10	intergenic	MKL1,MCHR1	dist\x3d29398\x3bdist\x3d8876
26	5310758	1.09e-06	intronic	PCDH15	.
26	5310786	1.23e-06	intronic	PCDH15	.

## Sheet: Table S6
Chromosome	Position	Pward	Func.refGene	Gene.refGene	GeneDetail.refGene
1	35945547	1.27e-07	intergenic	POU1F1,HTR1F	dist\x3d509881\x3bdist\x3d51799
1	35945558	7.41e-08	intergenic	POU1F1,HTR1F	dist\x3d509892\x3bdist\x3d51788
1	35945584	1.51e-07	intergenic	POU1F1,HTR1F	dist\x3d509918\x3bdist\x3d51762
3	36525172	1.13e-06	intergenic	TRNAC-ACA,TRNAC-GCA	dist\x3d184302\x3bdist\x3d618502
3	36525837	7.42e-07	intergenic	TRNAC-ACA,TRNAC-GCA	dist\x3d184967\x3bdist\x3d617837
3	36525861	3.31e-07	intergenic	TRNAC-ACA,TRNAC-GCA	dist\x3d184991\x3bdist\x3d617813
3	36525922	2.04e-07	intergenic	TRNAC-ACA,TRNAC-GCA	dist\x3d185052\x3bdist\x3d617752
3	36526016	3.58e-08	intergenic	TRNAC-ACA,TRNAC-GCA	dist\x3d185146\x3bdist\x3d617658
3	36526043	5.06e-07	intergenic	TRNAC-ACA,TRNAC-GCA	dist\x3d185173\x3bdist\x3d617631
3	36526059	7.88e-07	intergenic	TRNAC-ACA,TRNAC-GCA	dist\x3d185189\x3bdist\x3d617615
3	36526078	9.17e-07	intergenic	TRNAC-ACA,TRNAC-GCA	dist\x3d185208\x3bdist\x3d617596
3	41738896	7.69e-07	intergenic	OLFM3,S1PR1	dist\x3d243604\x3bdist\x3d294059
3	75547499	8.98e-07	intronic	LRRC7	.
3	77705305	5.74e-07	intergenic	GADD45A,TRNAW-CCA	dist\x3d53458\x3bdist\x3d157018
3	77709017	7.37e-07	intergenic	GADD45A,TRNAW-CCA	dist\x3d57170\x3bdist\x3d153306
3	77711652	1.06e-06	intergenic	GADD45A,TRNAW-CCA	dist\x3d59805\x3bdist\x3d150671
3	77728552	2.22e-07	intergenic	GADD45A,TRNAW-CCA	dist\x3d76705\x3bdist\x3d133771
3	77728559	2e-07	intergenic	GADD45A,TRNAW-CCA	dist\x3d76712\x3bdist\x3d133764
11	67763590	7.2e-07	intronic	GFPT1	.
18	58657975	1.17e-06	intronic	LOC101904435	.
20	8288936	1.11e-06	intergenic	FOXD1,TMEM174	dist\x3d100809\x3bdist\x3d158586
20	22691268	7.02e-07	intergenic	MAP3K1,ANKRD55	dist\x3d273840\x3bdist\x3d294774
23	32343204	5.08e-07	intronic	CARMIL1	.
23	32343711	3.58e-08	intronic	CARMIL1	.
28	20386045	4.32e-07	intergenic	REEP3,LOC785503	dist\x3d656512\x3bdist\x3d1366579
29	39422034	9.9e-07	intergenic	PAG6,PAG11	dist\x3d35327\x3bdist\x3d16790
29	41276440	9.65e-07	intergenic	LOC519202,SLC22A6	dist\x3d1920\x3bdist\x3d8978
29	41293857	4.05e-07	upstream	SLC22A6	.
29	41316148	9.62e-07	intronic	SLC22A8	.
29	41317578	8.63e-07	intronic	SLC22A8	.
29	41459003	6.07e-07	upstream	LOC526757	.
29	41483283	1.59e-07	intergenic	LOC526757,LOC522784	dist\x3d24745\x3bdist\x3d7989
29	41772343	4.62e-07	intronic	HRASLS5	.
29	41791032	7.81e-08	intronic	LGALS12	.
